# Supplementary material for: Helicobacter pylori VacA Suppresses Lactobacillus acidophilus-Induced Interferon Beta Signaling in Macrophages via Alterations in the Endocytic Pathway
Source: PubMed Central journal article supplement — mBio. 2013 Jun 11;4(3):e00609-12. doi: 10.1128/mBio.00609-12 (PMC3685213; doi:10.1128/mbio.00609-12), 2013-06-11
Supplement: mbo003131530st1.pdf [file mbo003131530st1.pdf]

**Suppl. Table 1. Top 20 induced genes in BMDMs stimulated with *L. acidophilus*.**

| Probe Name   | Gene Symbol | Fold Change | Description                               |
|--------------|-------------|-------------|-------------------------------------------|
| A_51_P385812 | Il12b       | 11.99       | Interleukin 12b                           |
| A_51_P217218 | Il6         | 11.50       | Interleukin 6                             |
| A_51_P181286 | Cd69        | 10.77       | CD69 antigen                              |
| A_51_P144180 | Ifnb1       | 10.75       | Interferon beta 1                         |
| A_51_P212782 | Il1b        | 10.71       | Interleukin 1 beta                        |
| A_51_P115005 | Edn1        | 10.55       | Endothelin 1                              |
| A_52_P224760 | Ptgs2       | 10.40       | Prostaglandin-endoperoxide synthase 2     |
| A_51_P363187 | Cxcl1       | 10.12       | Chemokine (C-X-C motif) ligand 1 (Cxcl1)  |
| A_52_P33202  | Shisa3      | 10.03       | Shisa homolog 3 ( <i>Xenopus laevis</i> ) |
| A_51_P438283 | Il1a        | 9.57        | Interleukin 1 alpha                       |
| A_52_P232813 | Cxcl3       | 9.54        | Chemokine (C-X-C motif) ligand 3          |
| A_51_P432641 | Cxcl10      | 9.18        | Chemokine (C-X-C motif) ligand 10         |
| A_52_P435154 | Ifi205      | 8.95        | Interferon activated gene 205             |
| A_52_P676403 | Cxcl11      | 8.80        | Chemokine (C-X-C motif) ligand 11         |
| A_51_P217463 | Cxcl2       | 8.65        | Chemokine (C-X-C motif) ligand 2          |
| A_52_P327664 | Gbp5        | 8.50        | Guanylate binding protein 5               |
| A_51_P317176 | Csf3        | 8.50        | Colony stimulating factor 3 (granulocyte) |
| A_52_P109378 | Fpr2        | 8.40        | Formyl peptide receptor 2                 |
| A_51_P123630 | Irg1        | 8.39        | Immune-responsive gene 1                  |
| A_51_P312485 | Fpr1        | 8.15        | Formyl peptide receptor 1                 |
