# Supplementary material for: Helicobacter pylori VacA Suppresses Lactobacillus acidophilus-Induced Interferon Beta Signaling in Macrophages via Alterations in the Endocytic Pathway
Source: PubMed Central journal article supplement — mBio. 2013 Jun 11;4(3):e00609-12. doi: 10.1128/mBio.00609-12 (PMC3685213; doi:10.1128/mbio.00609-12), 2013-06-11
Supplement: mbo003131530st2.pdf [file mbo003131530st2.pdf]

**Suppl Table 2. Top 20 induced genes in BMDMs stimulated with *H. pylori*.**

| Probe Name   | Gene Symbol | Fold Change | Description                                                                  |
|--------------|-------------|-------------|------------------------------------------------------------------------------|
| A_52_P232813 | Cxcl3       | 10.72       | Chemokine (C-X-C motif) ligand 3                                             |
| A_51_P212782 | Il1b        | 10.67       | Interleukin 1 beta                                                           |
| A_51_P363187 | Cxcl1       | 10.51       | Chemokine (C-X-C motif) ligand 1                                             |
| A_52_P224760 | Ptgs2       | 10.22       | Prostaglandin-endoperoxide synthase 2                                        |
| A_52_P33202  | Shisa3      | 10.01       | shisa homolog 3 ( <i>Xenopus laevis</i> )                                    |
| A_51_P317176 | Csf3        | 9.71        | Colony stimulating factor 3 (granulocyte)                                    |
| A_51_P217218 | Il6         | 9.25        | Interleukin 6                                                                |
| A_51_P438283 | Il1a        | 9.12        | Interleukin 1 alpha                                                          |
| A_51_P115005 | Edn1        | 8.58        | Endothelin 1                                                                 |
| A_51_P217463 | Cxcl2       | 8.48        | Chemokine (C-X-C motif) ligand 2                                             |
| A_51_P312485 | Fpr1        | 8.44        | Formyl peptide receptor 1                                                    |
| A_51_P123630 | Irg1        | 8.16        | Immune-responsive gene 1                                                     |
| A_52_P109378 | Fpr2        | 7.92        | Formyl peptide receptor 2                                                    |
| A_51_P181286 | Cd69        | 7.81        | CD69 antigen                                                                 |
| A_52_P327664 | Gbp5        | 7.61        | Guanylate binding protein 5                                                  |
| A_51_P474459 | Socs3       | 7.61        | Suppressor of cytokine signaling 3                                           |
| A_52_P435154 | Ifi205      | 7.51        | Interferon activated gene 205                                                |
| A_51_P385812 | Il12b       | 7.30        | Interleukin 12b                                                              |
| A_51_P337308 | Saa3        | 7.05        | Serum amyloid A 3                                                            |
| A_51_P387591 | Nfkbiz      | 7.04        | Nuclear factor of kappa light polypeptide gene enhancer in B-cells inhibitor |
